# Supplementary material for: Liquid water content in ice estimated through a full-depth ground radar profile and borehole measurements in western Greenland
Source: Copernicus journal article supplement (doi:10.5194/tc-11-669-2017), 2017-03-02
Supplement: Supplementary file 1 [file tc-11-669-2017-supplement.zip]

Archive with 2 entries (2 files):
- tc-11-669-2017-supplement-title-page.pdf
- ISmovie.avi
