# Supplementary material for: Liquid water content in ice estimated through a full-depth ground radar profile and borehole measurements in western Greenland
Source: Copernicus journal article supplement (doi:10.5194/tc-11-669-2017), 2017-03-02
Supplement: Supplementary file 1 [file tc-11-669-2017-supplement.zip › tc-11-669-2017-supplement-title-page.pdf]

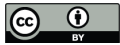

## *Supplement of*

# **Liquid water content in ice estimated through a full-depth ground radar profile and borehole measurements in western Greenland**

**Joel Brown et al.**

*Correspondence to:* Joel Brown ([joel@aesirmt.com](mailto:joel@aesirmt.com))

- [tc-11-669-2017-supplement-title-page.pdf](#)
- [ISmovie.avi](#)

The copyright of individual parts of the supplement might differ from the CC-BY 3.0 licence.
